# Supplementary material for: Growth environment and organ specific variation in in-vitro cytoprotective activities of Picea mariana in PC12 cells exposed to glucose toxicity: a plant used for treatment of diabetes symptoms by the Cree of Eeyou Istchee (Quebec, Canada)
Source: Springer Nature journal article supplement (doi:10.1186/s12906-019-2550-4), 2019-06-18

A:

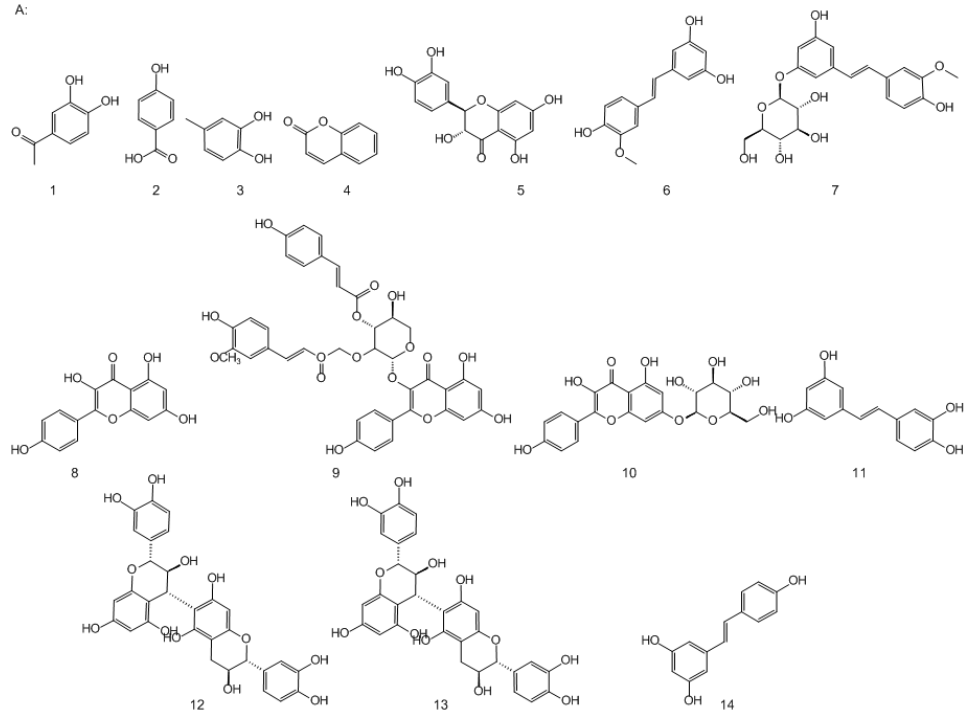

B:

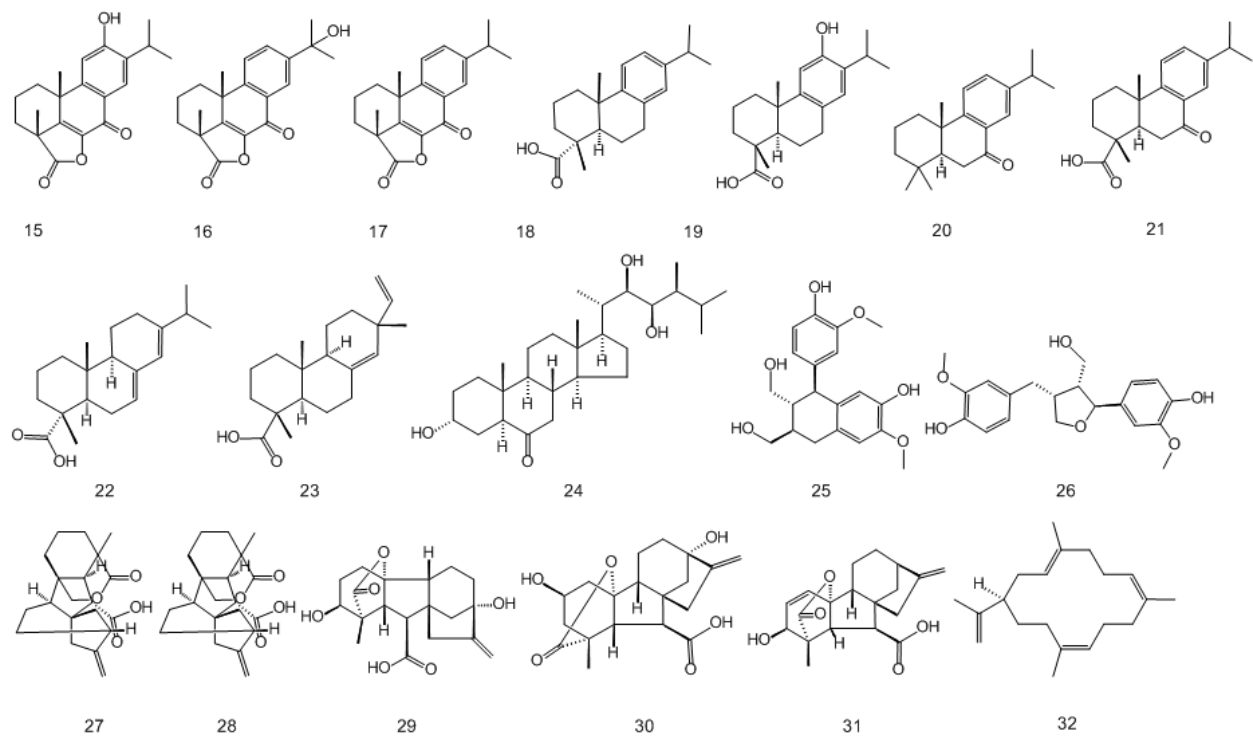

Supplement: MOESM4 [file 16823422]
